# Supplementary material for: Novel pterostilbene-loaded pro-phytomicelles: preclinical pharmacokinetics, distribution, and treatment efficacy against acetaminophen-induced liver injury
Source: Royal Society of Chemistry journal article supplement (doi:10.1039/d2fo01395a), 2022-01-01
Supplement: d2fo01395a1.pdf [file d2fo01395a1.pdf]

1 **Supporting Information (SI)**

2

3 **Novel pterostilbene-loaded pro-phytomices: preclinical pharmacokinetic, distribution,**  
4 **and treatment efficacy against acetaminophen-induced liver injury**

5

6 **Running title:** Novel pterostilbene pro-phytomices

7

8 Lu Liu<sup>1</sup>, Liping Zhou<sup>2</sup>, Cuicui Wang<sup>2</sup>, Zhixin Yuan<sup>3</sup>, Qilong Cao<sup>3\*</sup>, Mengshuang Li<sup>1,4\*</sup>, Xianggen

9

Wu<sup>1\*</sup>

10

11 1 College of Chemical Engineering, Qingdao University of Science and Technology, Qingdao,  
12 China;

13 2 Department of pathology, Qingdao municipal hospital, Qingdao, China;

14 3 Qingdao Haier Biotech Co. Ltd, Qingdao, China;

15 4 Qingdao Women and Children's Hospital, Qingdao 266034, China.

16

17 SI figures

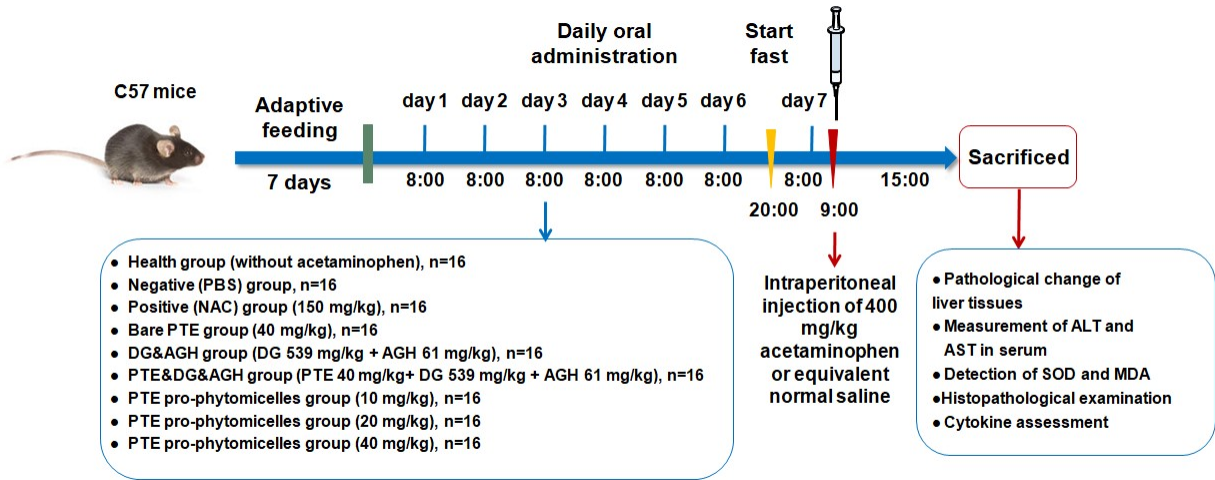

18

19 **SI Table**

20 Table S1 Pharmacokinetic parameters of PTE following oral administration of bare PTE and PTE

21 pro-phytomicelles.(n=6)

| <b>Parameters</b>                  | <b>Bare PTE</b> | <b>PTE pro-phytomicelles</b> |
|------------------------------------|-----------------|------------------------------|
| <b>C<sub>max</sub> (µg/ml)</b>     | 2.175           | 4.940*                       |
| <b>T<sub>max</sub> (min)</b>       | 240             | 60                           |
| <b>T<sub>1/2</sub> (h)</b>         | 1.76            | 1.65                         |
| <b>AUC<sub>0→t</sub> (ng/ml.h)</b> | 13115.72        | 34832.25                     |

22 \* Statistically significant compared with bare PTE ( $P < 0.05$ ).

23
